# Supplementary material
Source: MDPI journal article supplement (https://www.mdpi.com/2225-1154/10/3/35)
Supplement: s1 [file s1]

# Carbon Dynamic in Rewetted Tropical Peatlands

Taryono Darusman<sup>1</sup>, Daniel Murdiyarso<sup>1,2</sup>, Impron<sup>1</sup>, Iswandi Anas<sup>3</sup>, Dwi Puji Lestari<sup>4</sup>

<sup>1</sup> Department of Geophysics and Meteorology, IPB University, Dramaga Campus, Bogor 16680, Indonesia

<sup>2</sup> Center for International Forestry Research, Jl. CIFOR, Situgede, Bogor 16116, Indonesia

<sup>3</sup> Department of Soil Science and Land Resources, IPB University, Dramaga Campus, Bogor 16680, Indonesia

<sup>4</sup> Katingan—Mentaya Project, Central Kalimantan, Indonesia

\* Correspondence: taryono.d@gmail.com; Tel.: +62-811-119-3003

## Supplementary Information

**Table. S1.** List of formula to convert tree DBH and wood debris data into dry biomass

**Table. S2.** Before and after dam building ground water table in rewetted site and undrained site. The rainfall data was collected from the Katingan-Mentaya project weather station.

**Table. S3.** The properties of peat in the undrained site. The data was expressed in mean  $\pm$  SE

**Table. S4.** The properties of peat in the rewetted site. The data was expressed in mean  $\pm$  SE

**Figure S1.** Daily ground water table and daily rainfall in the study site from Mid-July 2018 – March 2020

**Table S1.** Formula to estimate the dry biomass

| Data                                                | Equation                                                                    | Result                | Reference                                     |
|-----------------------------------------------------|-----------------------------------------------------------------------------|-----------------------|-----------------------------------------------|
| Overstory DBH (cm)                                  | $0.136 \times \text{DBH}^{2.513}$                                           | Dry biomass (kg)      | Manuri et al. (2014)                          |
| Sapling DBH (cm)                                    | $0.136 \times \text{DBH}^{2.513}$                                           | Dry biomass (kg)      | Manuri et al. (2014)                          |
| <b>Standing dead wood – DBH (cm) and Height (m)</b> |                                                                             |                       |                                               |
| DC 1                                                | $0.975 \times 0.081 \times \text{DBH}^{2.049} \times \text{H}^{0.672}$      | Dry biomass (kg)      | Manuri et al. (2014) and Novita et al. (2020) |
| DC 2                                                | $0.8 \times 0.081 \times \text{DBH}^{2.049} \times \text{H}^{0.672}$        | Dry biomass (kg)      |                                               |
| DC 3                                                | $0.7 \times 0.081 \times \text{DBH}^{2.049} \times \text{H}^{0.672}$        | Dry biomass (kg)      |                                               |
| Dry biomass from<br>overstory and Sapling           | $0.33 \times (\text{overstory} + \text{Sapling})$                           | Root dry biomass (kg) | Suwarna et al. (2012)                         |
| <b>Wood debris with diameter</b>                    |                                                                             |                       |                                               |
| 2.5 – 7.5 cm                                        | $\text{sg} \times [\mu^2 \times (\text{NQMD}^2) / (8 \times \text{L})]$     | Dry biomass (Mg)      | Novita et al., (2020)                         |
| 7.5 cm                                              | $\text{sg} \times [(\mu^2 \times \Sigma \text{D}^2) / (8 \times \text{L})]$ | Dry biomass (Mg)      | Novita et al., (2020)                         |

Note: D: diameter, DC: decomposition class, DBH: Diameter at breast high, H: height, N: numbers, QMD: quadratic mean diameter, L: length of transect (m), and sg: specific gravity ( $\text{gr cm}^{-3}$ ) (sound wood debris = 0.5, rooten wood debris = 0.23).

**Table S2.** Before and after dam building ground water table in rewetted site and undrained site. The rainfall data was collected from the Katingan-Mentaya project weather station.

| Period                   |        | Rewetted (cm) |       | Undrained (cm) |       | Gap (cm) |      | Rainfall (mm) |
|--------------------------|--------|---------------|-------|----------------|-------|----------|------|---------------|
|                          |        | Mean          | SD    | Mean           | SD    | Mean     | SD   |               |
| July - October 2018      | Before | -32.89        | 18.33 | -15.35         | 15.18 | 17.55    | 6.74 | 540.60        |
| November - December 2018 |        | 9.08          | 4.89  | 13.62          | 4.07  | 4.54     | 1.94 | 914.76        |
| January - March 2019     | After  | 5.76          | 4.91  | 10.80          | 4.30  | 5.04     | 1.47 | 790.49        |
| April - June 2019        |        | 3.30          | 8.43  | 7.79           | 6.98  | 4.50     | 2.40 | 828.76        |
| July - October 2019      |        | -55.53        | 24.93 | -44.19         | 22.22 | 11.44    | 3.92 | 452.33        |
| November - December 2019 |        | -33.10        | 10.59 | -11.68         | 12.77 | 21.41    | 3.46 | 440.74        |

**Table S3.** The properties of peat in the undrained site. The data was expressed in mean  $\pm$  SE

| No | Initial section (cm) | End Section (cm) | incremental | Bulk Density (gr cm <sup>-3</sup> ) | Carbon Content (%) | Nitrogen Content (%) | C/N              | Carbon Density (kg m <sup>-3</sup> ) | N (sample) |
|----|----------------------|------------------|-------------|-------------------------------------|--------------------|----------------------|------------------|--------------------------------------|------------|
| 1  | 0                    | 15               | 15          | 0.09 $\pm$ 0.02                     | 49.46 $\pm$ 1.02   | 2.56 $\pm$ 0.09      | 20.33 $\pm$ 0.66 | 43.09 $\pm$ 6.18                     | 24         |
| 2  | 15                   | 30               | 15          | 0.07 $\pm$ 0.02                     | 50.39 $\pm$ 1.18   | 2.43 $\pm$ 0.09      | 22.07 $\pm$ 0.78 | 32.35 $\pm$ 5.72                     | 24         |
| 3  | 30                   | 50               | 20          | 0.06 $\pm$ 0.01                     | 51.89 $\pm$ 0.88   | 2.36 $\pm$ 0.09      | 23.53 $\pm$ 0.93 | 32.11 $\pm$ 5.03                     | 24         |
| 4  | 50                   | 100              | 50          | 0.06 $\pm$ 0.01                     | 53.41 $\pm$ 0.64   | 2.36 $\pm$ 0.11      | 23.49 $\pm$ 0.93 | 29.92 $\pm$ 3.59                     | 24         |
| 5  | 100                  | 200              | 100         | 0.06 $\pm$ 0.01                     | 54.98 $\pm$ 0.50   | 2.14 $\pm$ 0.11      | 28.02 $\pm$ 1.32 | 31.79 $\pm$ 2.49                     | 24         |
| 6  | 200                  | 300              | 100         | 0.06 $\pm$ 0.01                     | 54.77 $\pm$ 0.59   | 2.02 $\pm$ 0.11      | 29.80 $\pm$ 1.46 | 32.28 $\pm$ 3.20                     | 24         |
| 7  | 300                  | 400              | 100         | 0.10 $\pm$ 0.01                     | 53.68 $\pm$ 0.65   | 1.95 $\pm$ 0.11      | 30.36 $\pm$ 1.50 | 52.65 $\pm$ 3.68                     | 24         |
| 8  | 400                  | 410              | 10          | 0.34 $\pm$ 0.03                     | 33.17 $\pm$ 2.16   | 1.51 $\pm$ 0.14      | 24.82 $\pm$ 1.19 | 109.39 $\pm$ 10.53                   | 22         |

**Table S4.** The properties of peat in the rewetted site. The data was expressed in mean  $\pm$  SE

| No | Initial section<br>(cm) | End Section<br>(cm) | Incremental<br>(cm) | Bulk Density<br>(gr cm <sup>-3</sup> ) | Carbon<br>Content (%) | Nitrogen<br>Content (%) | C/N              | Carbon Density<br>(Kg m <sup>-3</sup> ) | N (sample) |
|----|-------------------------|---------------------|---------------------|----------------------------------------|-----------------------|-------------------------|------------------|-----------------------------------------|------------|
|    | 0                       | 15                  | 15                  | 0.07 $\pm$ 0.01                        | 50.47 $\pm$ 0.90      | 3.05 $\pm$ 0.11         | 16.98 $\pm$ 0.61 | 34.46 $\pm$ 3.62                        | 24         |
|    | 15                      | 30                  | 15                  | 0.05 $\pm$ 0.01                        | 52.51 $\pm$ 0.52      | 2.98 $\pm$ 0.10         | 18.13 $\pm$ 0.75 | 26.08 $\pm$ 2.34                        | 24         |
|    | 30                      | 50                  | 20                  | 0.04 $\pm$ 0.01                        | 52.66 $\pm$ 0.45      | 2.77 $\pm$ 0.11         | 19.90 $\pm$ 1.16 | 22.99 $\pm$ 2.14                        | 24         |
|    | 50                      | 100                 | 50                  | 0.06 $\pm$ 0.01                        | 53.51 $\pm$ 0.57      | 2.81 $\pm$ 0.08         | 19.39 $\pm$ 0.52 | 32.59 $\pm$ 4.29                        | 24         |
|    | 100                     | 200                 | 100                 | 0.07 $\pm$ 0.01                        | 55.01 $\pm$ 0.54      | 2.70 $\pm$ 0.09         | 20.79 $\pm$ 0.62 | 40.86 $\pm$ 2.57                        | 24         |
|    | 200                     | 300                 | 100                 | 0.06 $\pm$ 0.01                        | 52.73 $\pm$ 0.97      | 2.63 $\pm$ 0.09         | 20.46 $\pm$ 0.62 | 28.35 $\pm$ 4.79                        | 24         |
|    | 300                     | 400                 | 100                 | 0.15 $\pm$ 0.02                        | 41.75 $\pm$ 2.49      | 2.41 $\pm$ 0.09         | 17.69 $\pm$ 1.09 | 55.18 $\pm$ 3.35                        | 24         |
|    | 400                     | 410                 | 10                  | 0.26 $\pm$ 0.03                        | 30.28 $\pm$ 4.96      | 2.25 $\pm$ 0.02         | 14.79 $\pm$ 1.36 | 73.95 $\pm$ 1.20                        | 4          |

**Tabel S5.** Post hoc analysis using Tukey HSD to test the difference of peat properties within plots in rewetted and undrained site.

*Rewetted Site*

|          | Peat depth            | Bulk Density | Carbon Content        | Nitrogen Content      | C/N ratio | SOC      |
|----------|-----------------------|--------------|-----------------------|-----------------------|-----------|----------|
| R1 vs R2 | P < 0.05 <sup>a</sup> | P > 0.05     | P > 0.05              | P > 0.05              | P > 0.05  | P > 0.05 |
| R1 vs R3 | P > 0.05              | P > 0.05     | P > 0.05              | P < 0.05 <sup>a</sup> | P > 0.05  | P > 0.05 |
| R1 vs R4 | P > 0.05              | P > 0.05     | P > 0.05              | P > 0.05              | P > 0.05  | P > 0.05 |
| R2 vs R3 | P < 0.05 <sup>a</sup> | P > 0.05     | P < 0.05 <sup>a</sup> | P > 0.05              | P > 0.05  | P > 0.05 |
| R2 vs R4 | P < 0.05 <sup>a</sup> | P > 0.05     | P > 0.05              | P > 0.05              | P > 0.05  | P > 0.05 |
| R3 vs R4 | P > 0.05              | P > 0.05     | P > 0.05              | P < 0.05 <sup>a</sup> | P > 0.05  | P > 0.05 |

<sup>a</sup>: significant difference

SOC = Soil organic carbon

R = Rewetted

*Undrained Site*

|          | Peat depth | Bulk Density          | Carbon Content        | Nitrogen Content | C/N ratio | SOC                   |
|----------|------------|-----------------------|-----------------------|------------------|-----------|-----------------------|
| U1 vs U2 | P > 0.05   | P > 0.05              | P > 0.05              | P > 0.05         | P > 0.05  | P > 0.05              |
| U1 vs U3 | P > 0.05   | P < 0.05 <sup>a</sup> | P < 0.05 <sup>a</sup> | P > 0.05         | P > 0.05  | P < 0.05 <sup>a</sup> |
| U1 vs U4 | P > 0.05   | P < 0.05 <sup>a</sup> | P > 0.05              | P > 0.05         | P > 0.05  | P < 0.05 <sup>a</sup> |
| U2 vs U3 | P > 0.05   | P > 0.05              | P > 0.05              | P > 0.05         | P > 0.05  | P < 0.05 <sup>a</sup> |
| U2 vs U4 | P > 0.05   | P > 0.05              | P > 0.05              | P > 0.05         | P > 0.05  | P < 0.05 <sup>a</sup> |
| U3 vs U4 | P > 0.05   | P > 0.05              | P > 0.05              | P > 0.05         | P > 0.05  | P > 0.05              |

<sup>a</sup>: significant difference

SOC = Soil Organic Carbon

U = Undrained

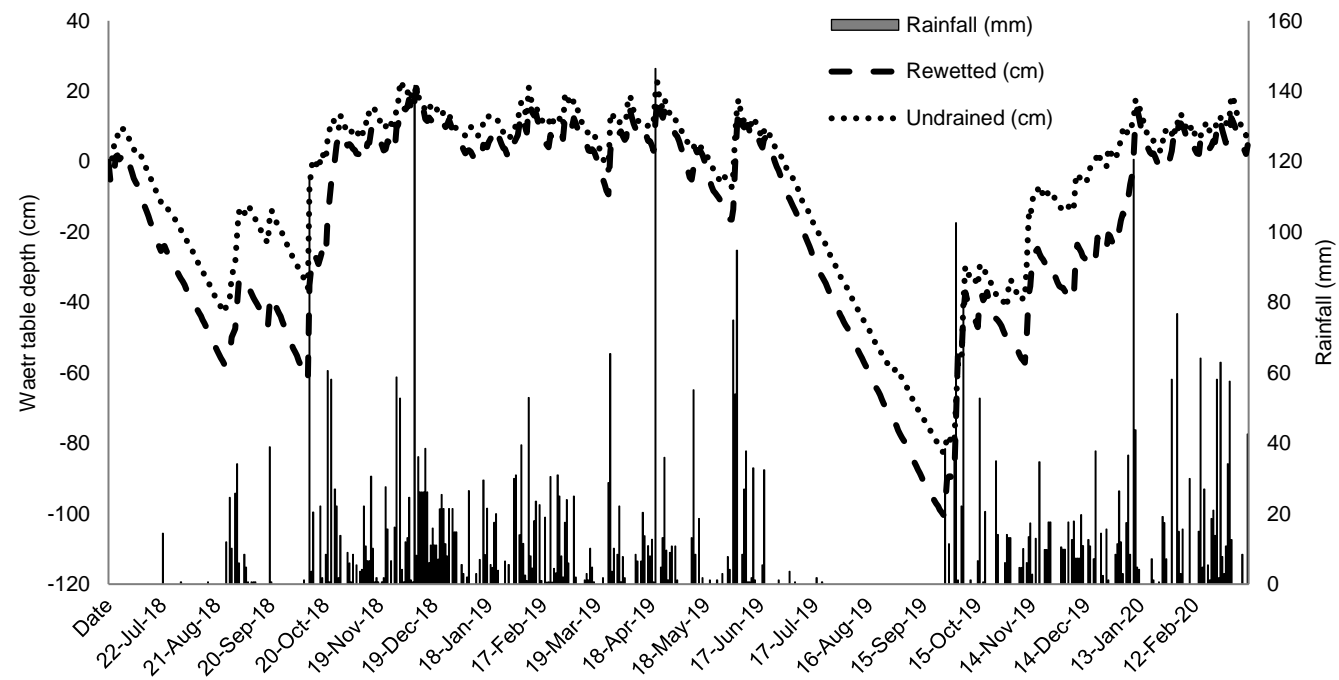

*Figure S1. Daily ground water table and daily rainfall in the study site from Mid-July 2018 – March 2020.*
